# Supplementary material
Source: PubMed Central journal article supplement (PMC3328594)
Supplement: NIHMS365108-supplement-1.pdf [file NIHMS365108-supplement-1.pdf]

## **Supplemental Table Legends**

### **Supplemental Table1: Demographic and pathologic data of human NSCLC samples**

**analyzed for TGF $\beta$ RII immunostaining and expression.** Unless otherwise noted data are expressed as raw numbers with percentages shown in parenthesis; percentages may not total 100 due to rounding. As expected with resected lung cancer samples there is a preponderance of early stage disease. Because banking protocols at both institutions (OHSU and UCD) included patients from the Veterans Administration, there is also a preponderance of male subjects and squamous cell carcinoma histology. NOTES: (1) Age was unavailable on 22 samples; (2) Gender was unavailable on 1 sample; (3) Never smokers were defined as having smoked fewer than 10 pack-years in their lifetime; (4) Includes 2 large cell carcinomas, 2 adenosquamous carcinomas, 2 pleomorphic carcinomas, and 1 mucoepithelioid carcinoma; these tumors were excluded from analyses comparing adenocarcinomas and squamous cell carcinomas; (5) Two samples clinically treated as synchronous primaries were scored as the T stage of the highest tumor; (6) Twenty two resected cancers were assumed to be M0 although this could not be independently confirmed in the medical record; (7) Clinical stage was determined according to the 2009 consensus guidelines (42) although many subjects had initial clinical staging under the previous staging guidelines (43); (8) Since survival was determined using the social security death index (SSDI), this could only be assessed on subjects with available social security numbers; if a death record could not be located in the SSDI after searching by social security number and name/date of birth, subjects were assumed to be alive.

### **Supplemental Table 2: TGF $\beta$ RII deletion promotes Kras-initiated tumor formation.**

Animals harboring the noted genetic alterations were treated with tracheal RU486 as shown and monitored as described in methods. Age (in weeks) is when animals were euthanized (>80% of animals were euthanized between 40-62 weeks of age); N is the number of animals of each genotype analyzed; tracheal RU486 dose is in  $\mu$ g (the 1000 $\mu$ g dose was administered in two

500µg doses delivered 7d apart); penetrance is the percent of animals that developed any grossly visible lung tumors; tumor number is shown as mean ± SEM and range for animals that developed tumors. \*p<0.05 vs. K5Cre\*PR.Kras.

### **Supplemental Figure Legends**

#### **Supplemental Figure 1: Reduced TGFβRII expression correlates with smoking exposure.**

(PKY = pack years or one pack per day for one year).

#### **Supplemental Figure 2: TGFβRII deletion increases the size of Kras-initiated lung**

**tumors.** Symbols represent individual tumor sizes with mean shown in red. On average Kras tumors were  $0.93 \pm 0.09$  mm, Kras.TGFβRII<sup>+/-</sup> tumors were  $1.22 \pm 0.04$  mm, and Kras.TGFβRII<sup>-/-</sup> tumors were  $1.07 \pm 0.02$  mm, both of which are significantly larger than Kras tumors (p<0.05).

#### **Supplemental Figure 3: Kras.TGFβRII<sup>-/-</sup> mice develop TTF positive, K5 negative**

**adenocarcinomas and K5 positive, TTF negative squamous cell carcinomas.** The scale bar is 50µm.

#### **Supplemental Figure 4: TGFβRII deletion increases proliferation, TGFβ1 ligand**

**elaboration, and inflammation *in vivo*:** (A) Kras.TGFβRII<sup>-/-</sup> tumors have increased proliferation (PCNA staining) compared to Kras tumors. Scale bar is 100µm; quantification is shown in Fig. 5A. (B) Increased tumor burden in Kras.TGFβRII<sup>-/-</sup> mice correlates with increased BAL TGFβ1. (C) Increasing BAL macrophage count correlates with increasing tumor burden in Kras.TGFβRII<sup>-/-</sup> mice. (D) TGFβRII deletion increases recruitment of CD3<sup>+</sup> lymphocytes to lung tumors. Scale bar is 50µm; quantification is shown in Fig. 5D.

**Supplemental Figure 5: Stable TGF $\beta$ RII knockdown in Beas2B cells increases TGF $\beta$ 1 ligand elaboration.** (A) Reduced TGF $\beta$ RII expression at the mRNA and protein levels. (B-C) TGF $\beta$ RII knockdown increases TGF $\beta$ 1 mRNA and protein. (D) TGF $\beta$ RII knockdown does not increase proliferation of Beas2B cells in MTT assay.

**Supplemental Figure 6: Reduced TGF $\beta$ RII expression in human lung cancer samples is associated with increased CD3+ lymphocyte infiltration.** (A) Human lung cancer samples with preserved and reduced TGF $\beta$ RII expression were immunostained for lymphocytes and macrophages with anti-CD3 and anti-MAC387 antibody. (B-C) Human lung cancer samples with reduced TGF $\beta$ RII immunostaining have increased infiltration of CD3+ lymphocytes (brown) but not macrophages (brown). Immunostaining was quantified in four 10X fields of 24-30 human NSCLC samples. The scale bar is 100 $\mu$ m.
