# Supplementary material
Source: PubMed Central journal article supplement (PMC3328594)
Supplement: NIHMS365108-supplement-6.pdf [file NIHMS365108-supplement-6.pdf]

Supplemental Table 1

|                                       | all cases  | w/IHC data   | w/ mRNA data |
|---------------------------------------|------------|--------------|--------------|
|                                       | 187        | 172          | 48           |
| <b>Age median (range)<sup>1</sup></b> | 63 (28-89) | 62.5 (28-89) | 68 (51-85)   |
| <b>Gender<sup>2</sup></b>             |            |              |              |
| male                                  | 121 (65)   | 110 (65)     | 21 (44)      |
| female                                | 65 (35)    | 60 (35)      | 27 (56)      |
| <b>Smoking<sup>3</sup></b>            |            |              |              |
| current                               | 24 (13)    | 20 (15)      | 12 (25)      |
| former                                | 49 (26)    | 38 (22)      | 20 (42)      |
| never                                 | 9 (5)      | 12 (7)       | 5 (10)       |
| unknown                               | 105 (56)   | 102 (59)     | 13 (27)      |
| <b>Histology</b>                      |            |              |              |
| Adeno-BAC                             | 70 (37)    | 62 (36)      | 18 (38)      |
| SCC                                   | 110 (59)   | 103 (60)     | 26 (54)      |
| other <sup>4</sup>                    | 7 (4)      | 7 (4)        | 4 (8)        |
| <b>T stage<sup>5</sup></b>            |            |              |              |
| T1                                    | 42 (22)    | 37 (22)      | 18 (38)      |
| T2                                    | 105 (56)   | 98 (57)      | 24 (50)      |
| T3                                    | 33 (18)    | 32 (19)      | 6 (13)       |
| T4                                    | 5 (3)      | 3 (2)        | 0 (0)        |
| Tx                                    | 2 (1)      | 2 (1)        | 0 (0)        |
| <b>N stage</b>                        |            |              |              |
| N0                                    | 109 (58)   | 100 (58)     | 31 (65)      |
| N1                                    | 34 (18)    | 30 (17)      | 13 (27)      |
| N2                                    | 28 (15)    | 27 (16)      | 3 (6)        |
| N3                                    | 13 (7)     | 12 (7)       | 0 (0)        |
| Nx                                    | 3 (2)      | 3 (2)        | 1 (2)        |
| <b>M stage<sup>6</sup></b>            |            |              |              |
| M0                                    | 171 (91)   | 156 (91)     | 46 (96)      |
| M1                                    | 16 (9)     | 16 (9)       | 2 (4)        |
| <b>Clinical stage<sup>7</sup></b>     |            |              |              |
| I                                     | 83 (44)    | 77 (45)      | 27 (56)      |
| II                                    | 46 (25)    | 41 (23)      | 15 (31)      |
| III                                   | 39 (21)    | 35 (20)      | 4 (8)        |
| IV                                    | 16 (9)     | 16 (9)       | 2 (4)        |
| unk                                   | 3 (2)      | 3 (2)        | 0 (0)        |
| <b>Differentiation</b>                |            |              |              |
| well                                  | 33 (18)    | 30 (17)      | 8 (17)       |
| mod                                   | 73 (39)    | 67 (39)      | 20 (42)      |
| poor                                  | 81 (43)    | 75 (44)      | 20 (42)      |
| <b>Survival<sup>8</sup></b>           |            |              |              |
| alive                                 | 43 (23)    | 38 (22)      | 11 (23)      |
| dead                                  | 42 (22)    | 33 (19)      | 25 (52)      |
| unknown                               | 102 (56)   | 102 (62)     | 12 (25)      |
