# Supplementary material
Source: PubMed Central journal article supplement (PMC3328594)
Supplement: NIHMS365108-supplement-9.pdf [file NIHMS365108-supplement-9.pdf]

Supplemental Table 2

| GENOTYPE                                                            | AGE (wk) | N  | TRACHEAL RU486 ( $\mu$ g) | PENETRANCE (%) | TUMOR # (ave $\pm$ SEM) (range) |
|---------------------------------------------------------------------|----------|----|---------------------------|----------------|---------------------------------|
| Kras.TGF $\beta$ R11 ff<br>TGF $\beta$ R11 ff<br>TGF $\beta$ R11 fw | 34-55    | 16 | 1000                      | 0              | 0                               |
| KSCrePR <sup>+</sup> .TGF $\beta$ R11 ff                            | 31-73    | 30 | 1000                      | 3              | 1 (1)                           |
| KSCrePR <sup>+</sup> .Kras                                          | 35-76    | 13 | 1000                      | 84             | 3.22 $\pm$ 0.99 (1-9)           |
| KSCrePR <sup>+</sup> .Kras.TGF $\beta$ R11 fw                       | 31-56    | 9  | 500                       | 63             | 25.4 $\pm$ 5.3* (16-43)         |
| KSCrePR <sup>+</sup> .Kras.TGF $\beta$ R11 ff                       | 50-62    | 6  | 0 (vehicle)               | 66             | 5.7 $\pm$ 4.0 (1-16)            |
| KSCrePR <sup>+</sup> .Kras.TGF $\beta$ R11 ff                       | 40-62    | 14 | 500                       | 64             | 17.9 $\pm$ 5.0* (1-38)          |
| KSCrePR <sup>+</sup> .Kras.TGF $\beta$ R11 ff                       | 33-61    | 24 | 1000 (divided)            | 78             | 42.1 $\pm$ 8.1* (4-114)         |
