# Supplementary material
Source: PubMed Central journal article supplement (PMC3328594)

Supplemental Figure 1

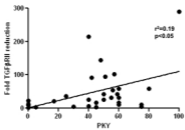

Supplement: NIHMS365108-supplement-2.pdf [file NIHMS365108-supplement-2.pdf]

Supplemental Figure 2

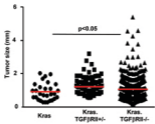

Supplement: NIHMS365108-supplement-3.pdf [file NIHMS365108-supplement-3.pdf]

Supplemental Figure 3

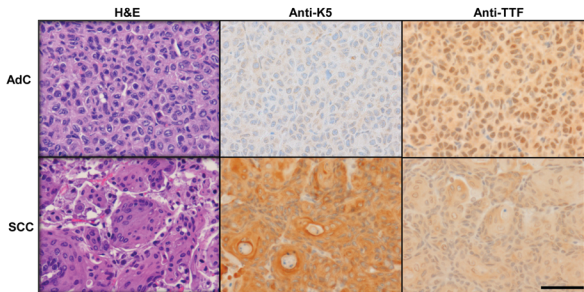

Supplement: NIHMS365108-supplement-4.pdf [file NIHMS365108-supplement-4.pdf]

Supplemental Figure 4

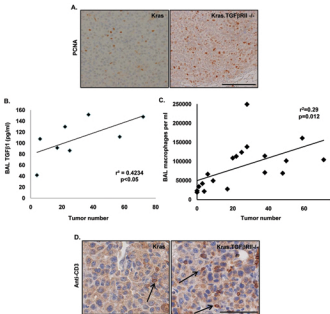

Supplement: NIHMS365108-supplement-5.pdf [file NIHMS365108-supplement-5.pdf]

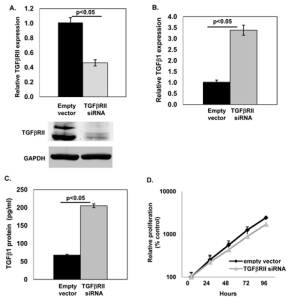

Supplement: NIHMS365108-supplement-7.pdf [file NIHMS365108-supplement-7.pdf]

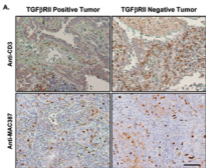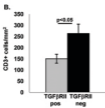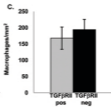

Supplement: NIHMS365108-supplement-8.pdf [file NIHMS365108-supplement-8.pdf]
